# Supplementary material for: Interventions to prevent, delay or reverse frailty in older people: a journey towards clinical guidelines
Source: PubMed Central journal article supplement (PMC6819620; doi:10.1186/s12916-019-1434-2), 2019-10-29
Supplement: 12916_2019_1434_MOESM1_ESM.pdf [file 12916_2019_1434_MOESM1_ESM.pdf]

**Q1.1 Should interventions based on physical activity/exercise be recommended to prevent or delay the progression of or to revert frailty?**

Considering the evidence on the impact on Frailty as a whole (regardless of the definition used for the outcome)

| OUTCOME                                                                                             | Study           | Intervention                                                                                                                                                                                                                                                                                                                    | Duration of intervention (total)                                   | Comparison                                | Setting            | Frailty definition | Frail - Prefrail | Pt n (total) | Pt n (intervention) | Pt n (control) | FUP duration                                         | Narrative description of results                                                                                                                                                                                                                                                                                                                                | Quality of evidence (GRADE) - overall | Quality of evidence (GRADE) - Prefrail | Quality of evidence (GRADE) - Frail |
|-----------------------------------------------------------------------------------------------------|-----------------|---------------------------------------------------------------------------------------------------------------------------------------------------------------------------------------------------------------------------------------------------------------------------------------------------------------------------------|--------------------------------------------------------------------|-------------------------------------------|--------------------|--------------------|------------------|--------------|---------------------|----------------|------------------------------------------------------|-----------------------------------------------------------------------------------------------------------------------------------------------------------------------------------------------------------------------------------------------------------------------------------------------------------------------------------------------------------------|---------------------------------------|----------------------------------------|-------------------------------------|
| Frailty according to a composite index (continuous)                                                 | [45] Ng         | Multicomponent exercise intervention, moderate, gradually increasing intensity, tailored to participants' individual abilities. Resistance exercises, balance training exercises involving functional strength, sensory input, and added attentional demands Group, supervised by a qualified trainer (for 12 weeks) then alone | 12 weeks in classes, followed by 12 weeks of home-based exercises. | Usual care                                | Community dwelling | Fried (CHS)        | Prefrail         | 98           | 48                  | 50             | 1 year                                               | M (SD)<br>Intervention<br>Pre 2.2 (0.85)<br>3 m 1.2 (0.75)<br>6 m 1.3 (0.87)<br>12 m 1.4 (0.80)<br>Control<br>Pre 1.8 (0.80)<br>3 m 1.3 (0.85)<br>6 m 1.4 (1.06)<br>12 m 1.6 (0.97)<br>Significant difference in change between intervention and control at 3 m, 6 m and 12 m.                                                                                  |                                       |                                        |                                     |
|                                                                                                     | [45] Ng         | Multicomponent exercise intervention, moderate, gradually increasing intensity, tailored to participants' individual abilities. Resistance exercises, balance training exercises involving functional strength, sensory input, and added attentional demands Group, supervised by a qualified trainer (for 12 weeks) then alone | 12 weeks in classes, followed by 12 weeks of home-based exercises. | Usual care                                | Community dwelling | Fried (CHS)        | Prefrail         | 98           | 48                  | 50             | 1 year                                               | Transition to a lower frailty category<br>interv: 41.3%<br>contr: 15.2%<br>Significant OR 4.05 (1.50-10.8)                                                                                                                                                                                                                                                      |                                       |                                        |                                     |
| Frailty according to a composite index (dichotomous - transition to a less severe frailty category) | [40] Kim Suzuki | Multicomponent exercise intervention, moderate intensity (warm-up, strengthening exercises, balance and gait training, cool-down). Group, supervised (instructor + trainers), delivered at a research institute of gerontology                                                                                                  | 3 months                                                           | Usual care                                | Community dwelling | Fried              | Frail            | 66 (63)      | 33 (31)             | 33 (32)        | 3 months (+ 4 months of follow up post intervention) | Reversal post intervention<br>interv: 51.5%<br>contr: 30.3%<br>Odds Ratio (95% CI) 2.44 (0.89-6.70)<br>Reversal post 4 m:<br>interv: 39.4%<br>contr: 15.2%<br>OR 3.64 (1.12-11.85)                                                                                                                                                                              |                                       |                                        |                                     |
|                                                                                                     | No study        |                                                                                                                                                                                                                                                                                                                                 |                                                                    |                                           |                    |                    |                  |              |                     |                |                                                      |                                                                                                                                                                                                                                                                                                                                                                 |                                       |                                        |                                     |
| Short Physical Performance Battery                                                                  | [39] Hars       | Multitask exercise program based on Jaques-Dalcroze eurhythmic (walking following the piano music, responding directly or oppositely to changes in music's rhythmic patterns, phrases, form or other aspects) Group, in community centres, supervised by a certified instructor                                                 | 6 months                                                           | Usual care (discontinuation of intervent) | Community dwelling | Fried              | Prefrail         | 101 (52)     | 26 (23)             | 75 (29)        | 4 years                                              | mean ± SD (sec)<br>Intervention<br>Pre 9.7 ± 2.2<br>Post 1 y 9.3 ± 1.9<br>Post 4 y 10.0 ± 2.0<br>Control<br>Pre 10.5 ± 2.1<br>Post 1 y 9.8 ± 1.8<br>Post 4 y 12.7 ± 3.7<br>Significant difference in change between intervention and control, from baseline to 4 years and from 1 y to 4 years (even if from 1 to 4 y the performance worsened in both groups). |                                       |                                        |                                     |

**Time up and Go**

[40] Kim Suzuki

Multicomponent exercise intervention, moderate intensity (warm-up, strengthening exercises, balance and gait training, cool-down).  
Group, supervised (instructor + trainers), delivered at a research institute of gerontology

3 months

Usual care

Community dwelling

Fried

Frail

66 (63)

33 (31)

33 (32)

3 months (+ 4 months of follow up post intervention)

Mean [sec] ± SD  
Intervention  
Pre 9.89 ± 2.27  
Post 7.87 ± 1.83  
Post 4 m 7.04 ± 1.45  
Control  
Pre 10.44 ± 3.79  
Post 10.00 ± 4.32  
Post 4 m 7.99 ± 3.79  
Significant difference in mean change between pre- and post-intervention in the intervention compared with the control  
- No effect at FUP

[32] Cadore et al., 2014

Multicomponent exercise intervention (high-speed resistance training, balance, and gait exercises, on muscle strength) Individual, at the nursing home, supervised by one experienced physical trainer

12 weeks

Usual care (mobility exercise)

Institutionalized

Fried

Frail

32 (24)

16 (11)

16 (13)

12 weeks

Intervention  
Pre 19.9±8.0 sec  
Post 18.8±7.9 sec  
Control  
Pre 18.4±5.1 sec  
Post 21.8±6.3 sec  
Significant difference in change pre-post between intervention and control

[34] Clegg

Strengthening exercises for the muscle groups required for basic mobility skills (exercise manual) Individual, at home, with the support (weekly home visits and telephone calls) of physiotherapists

12 weeks

Usual care

Mixed population (community dwelling people in assisted living conditions)

Edmonton

Frail

84 (70)

45 (40)

39 (30)

12 weeks

Intervention  
Pre 52.0 (62.4) sec  
Post 62.4 (77.7) sec  
Change -10.4 (64.0) sec  
Control  
Pre 57.9 (74.1) sec  
Post 97.0 (116.7) sec  
Change -39.1 (90.6) sec  
Diff unadj [mean (95% CI)]  
28.7 (-8.2, 65.5)  
Diff adj [mean (95% CI)]  
28.6 (-8.5, 65.9)

[39] Hars

Multitask exercise program based on Jaques-Dalcroze eurhythmics (walking following the piano music, responding directly or oppositely to changes in music's rhythmic patterns, phrases, form or other aspects)  
Group, in community centres, supervised by a certified instructor

6 months

Usual care (discontinuation of intervent)

Community dwelling

Fried

Prefrail

101 (52)

26 (23)

75 (29)

4 years

mean ± SD (sec)  
Intervention  
Pre 9.7 ± 2.2  
Post 1 y 9.3 ± 1.9  
Post 4 y 10.0 ± 2.0  
Control  
Pre 10.5 ± 2.1  
Post 1 y 9.8 ± 1.8  
Post 4 y 12.7 ± 3.7  
Significant difference in change between intervention and control, from baseline to 4 years and from 1 y to 4 years (even if from 1 to 4 y the performance worsened in both groups).

⊕⊕⊕⊕  
**LOW**  
Due to study limitations, inconsistency (different populations)

⊕⊕⊕⊕/⊕⊕⊕⊕  
**LOW to MODERATE**  
Due to study limitations (substantial in all studies except in Ng et al.), inconsistency

⊕⊕⊕⊕  
**LOW**  
Due to study limitations (substantial in all studies), inconsistency



**Handgrip strength**

|                          |                                                                                                                                                                                                                                   |          |                                  |                    |                                                    |          |           |         |         |                                                      |                                                                                                                                                                                                                                                                                                                              |
|--------------------------|-----------------------------------------------------------------------------------------------------------------------------------------------------------------------------------------------------------------------------------|----------|----------------------------------|--------------------|----------------------------------------------------|----------|-----------|---------|---------|------------------------------------------------------|------------------------------------------------------------------------------------------------------------------------------------------------------------------------------------------------------------------------------------------------------------------------------------------------------------------------------|
| [48] Wolf                | Tai Chi, group, supervised by one instructor                                                                                                                                                                                      | 15 weeks | Education + exercise suggestions | Community dwelling | biomedical, functional and psychosocial indicators | Prefrail | 136 (112) | 72 (58) | 64 (54) | 15 weeks + 4 months                                  | Mean, kg (SD)<br>Intervention<br>Pre 23.27 (8.29)<br>Post 22.57 (8.5)<br>FUP 22.87 (8.1)<br>Control<br>Pre 23.87 (6.5)<br>Post 22.07 (6.2)<br>FUP 22.27 (6.6)<br>Significant difference in change between intervention and control.                                                                                          |
| [40] Kim Suzuki          | Multicomponent exercise intervention, moderate intensity (warm-up, strengthening exercises, balance and gait training, cool-down).<br>Group, supervised (instructor + trainers), delivered at a research institute of gerontology | 3 months | Usual care                       | Community dwelling | Fried                                              | Frail    | 66 (63)   | 33 (31) | 33 (32) | 3 months (+ 4 months of follow up post intervention) | Mean, kg (SD)<br>Intervention<br>Pre 17.94 ± 3.00<br>Post 18.36 ± 3.28<br>Post 4 m 17.75 ± 2.90<br>Control<br>Pre 18.92 ± 3.38<br>Post 19.18 ± 3.50<br>Post 4 m 18.08 ± 2.92<br>No significant difference in mean change between pre- and post-intervention in the intervention compared with the control - No effect at FUP |
| [32] Cadore et al., 2014 | Multicomponent exercise intervention (high-speed resistance training, balance, and gait exercises, on muscle strength) Individual, at thenursing home, supervised by one experienced physical trainer                             | 12 weeks | Usual care (mobility exercise)   | Institutionalized  | Fried                                              | Frail    | 32 (24)   | 16 (11) | 16 (13) | 12 weeks                                             | Mean, N (SD) Intervention<br>Pre 165±63<br>Post 183±52<br>Control<br>Pre 157±64<br>Post 130±58<br>Significant difference in change pre-post between intervention and control                                                                                                                                                 |

**Q1.2 Should nutritional interventions (e.g. supplementation, diet modification) be recommended to prevent or delay the progression of or to revert frailty?**

Considering the evidence on the impact on Frailty as a whole (regardless of the definition used for the outcome)

| OUTCOME                                             | Study           | Intervention                                                                                                                                                                                                                           | Duration of intervention (total) | Comparison | Setting            | Frailty definition                                                                                                     | Frail - Prefrail | Pt n (total) | Pt n (intervention) | Pt n (control) | FUP duration                                        | Narrative description of M (SD)                                                                                                                                                                                                                                                                                                                                                                                                                                                                                                                                                                                                                                | Quality of evidence (GRADE) - overall | Quality of evidence (GRADE) - Prefrail | Quality of evidence (GRADE) - Frail |
|-----------------------------------------------------|-----------------|----------------------------------------------------------------------------------------------------------------------------------------------------------------------------------------------------------------------------------------|----------------------------------|------------|--------------------|------------------------------------------------------------------------------------------------------------------------|------------------|--------------|---------------------|----------------|-----------------------------------------------------|----------------------------------------------------------------------------------------------------------------------------------------------------------------------------------------------------------------------------------------------------------------------------------------------------------------------------------------------------------------------------------------------------------------------------------------------------------------------------------------------------------------------------------------------------------------------------------------------------------------------------------------------------------------|---------------------------------------|----------------------------------------|-------------------------------------|
| Frailty according to a composite index (continuous) | [45] Ng         | Nutritional supplement designed to augment caloric intake by about 20% and provide about one third of the recommended daily allowances of vitamins and minerals administered nurse                                                     | 6 months                         | Usual care | Community dwelling | Fried (CHS)                                                                                                            | Prefrail         | 99           | 49                  | 50             | 1 year                                              | Intervention<br>Pre 2.1 (0.78)<br>3 m 1.5 (1.06)<br>6 m 1.4 (0.78)<br>12 m 1.5 (0.91)<br>Control<br>Pre 1.8 (0.80)<br>3 m 1.3 (0.85)<br>6 m 1.4 (1.06)<br>12 m 1.6 (0.97)<br>Significant difference in change between intervention and control at 2.22.                                                                                                                                                                                                                                                                                                                                                                                                        |                                       |                                        |                                     |
|                                                     | [40] Kim Suzuki | milk fat globule membrane (MFGM) supplementation<br>Nutritional supplement designed to augment caloric intake by about 20% and provide about one third of the recommended daily allowances of vitamins and minerals administered nurse | 3 months                         | Usual care | Community dwelling | Fried                                                                                                                  | Frail            | 65 (62)      | 32 (30)             | 33 (32)        | 3 months (+4 months of follow up post intervention) | Frailty reversal post intervention:<br>Interv: 28.5%<br>Contr: 30.3%<br>OR 0.90 (0.31-2.62)<br>post 4 m:<br>Interv: 25.0%<br>Contr: 30.3%<br>OR 1.87 (0.54-6.47)<br>Transition to a lower frailty category:<br>Interv: 35.6%<br>Contr: 15.2%<br>OR 2.88 (1.10-7.07)                                                                                                                                                                                                                                                                                                                                                                                            |                                       |                                        |                                     |
| Short Physical Performance Battery                  | [41] Kim Lee    | Nutritional supplementation (Protein-energy)                                                                                                                                                                                           | 12 weeks                         | Usual care | Community dwelling | Presence of low mobility (usual gate speed < 0.6 m/second) and poor nutrition (Mini Nutritional Assessment score < 24) | Frail            | 87 (84)      | 43 (42)             | 44 (42)        | 12 weeks                                            | Median or mean ± SD<br>Intervention<br>Pre 10.77 ± 2.58<br>Post 10.53 ± 2.77<br>Post 4 m 7.76 ± 1.52<br>Control<br>Pre 10.44 ± 2.79<br>Post 10.00 ± 4.32<br>Post 4 m 7.99 ± 3.79<br>No significant difference in mean change between pre- and post-intervention in the intervention compared with the control - No effect at FUP<br>Median or mean ± SD [sec]<br>Intervention<br>Pre 22.2 ± 12.4<br>Post 21.4 ± 12.2<br>Difference -1.1 (-5.5, 1.9)<br>Control<br>Pre 21.5 ± 12.7<br>Post 26.4 ± 25.3<br>Difference 0.9 (-2.3, 4.5)<br>Significant difference in mean change between pre- and post-intervention in the intervention compared with the control  |                                       |                                        |                                     |
|                                                     | [40] Kim Suzuki | milk fat globule membrane (MFGM) supplementation                                                                                                                                                                                       | 3 months                         | Usual care | Community dwelling | Fried                                                                                                                  | Frail            | 65 (62)      | 32 (30)             | 33 (32)        | 3 months (+4 months of follow up post intervention) | Intervention<br>Pre 10.77 ± 2.58<br>Post 10.53 ± 2.77<br>Post 4 m 7.76 ± 1.52<br>Control<br>Pre 10.44 ± 2.79<br>Post 10.00 ± 4.32<br>Post 4 m 7.99 ± 3.79<br>No significant difference in mean change between pre- and post-intervention in the intervention compared with the control - No effect at FUP<br>Median or mean ± SD [sec]<br>Intervention<br>Pre 22.2 ± 12.4<br>Post 21.4 ± 12.2<br>Difference -1.1 (-5.5, 1.9)<br>Control<br>Pre 21.5 ± 12.7<br>Post 26.4 ± 25.3<br>Difference 0.9 (-2.3, 4.5)<br>Significant difference in mean change between pre- and post-intervention in the intervention compared with the control                         |                                       |                                        |                                     |
| Time up and Go                                      | [41] Kim Lee    | Nutritional supplementation (Protein-energy)                                                                                                                                                                                           | 12 weeks                         | Usual care | Community dwelling | Presence of low mobility (usual gate speed < 0.6 m/second) and poor nutrition (Mini Nutritional Assessment score < 24) | Frail            | 87 (84)      | 43 (41)             | 44 (43)        | 12 weeks                                            | Median or mean ± SD<br>Intervention<br>Pre 1.10 ± 0.22<br>Post 1.08 ± 0.23<br>Post 4 m 1.11 ± 0.20<br>Control<br>Pre 1.18 ± 0.24<br>Post 1.13 ± 0.22<br>Post 4 m 1.18 ± 0.23<br>No significant difference in mean change between pre- and post-intervention in the intervention compared with the control - No effect at FUP<br>Median or mean ± SD (m/sec)<br>Intervention<br>Pre 0.35 ± 0.13<br>Post 0.35 ± 0.13<br>Difference 0 (-0.06, 0.07)<br>Control<br>Pre 0.38 ± 0.13<br>Post 0.32 ± 0.14<br>Difference -0.04 (-0.13, 0.04)<br>Significant difference in mean change between pre- and post-intervention in the intervention compared with the control | ⊕⊕⊕⊕                                  | ⊕⊕⊕⊕                                   | ⊕⊕⊕⊕                                |
|                                                     | [40] Kim Suzuki | milk fat globule membrane (MFGM) supplementation                                                                                                                                                                                       | 3 months                         | Usual care | Community dwelling | Fried                                                                                                                  | Frail            | 65 (62)      | 32 (30)             | 33 (32)        | 3 months (+4 months of follow up post intervention) | Intervention<br>Pre 1.10 ± 0.22<br>Post 1.08 ± 0.23<br>Post 4 m 1.11 ± 0.20<br>Control<br>Pre 1.18 ± 0.24<br>Post 1.13 ± 0.22<br>Post 4 m 1.18 ± 0.23<br>No significant difference in mean change between pre- and post-intervention in the intervention compared with the control - No effect at FUP<br>Median or mean ± SD (m/sec)<br>Intervention<br>Pre 0.35 ± 0.13<br>Post 0.35 ± 0.13<br>Difference 0 (-0.06, 0.07)<br>Control<br>Pre 0.38 ± 0.13<br>Post 0.32 ± 0.14<br>Difference -0.04 (-0.13, 0.04)<br>Significant difference in mean change between pre- and post-intervention in the intervention compared with the control                        | ⊕⊕⊕⊕                                  | ⊕⊕⊕⊕                                   | ⊕⊕⊕⊕                                |
| Walking Speed                                       | [41] Kim Lee    | Nutritional supplementation (Protein-energy)                                                                                                                                                                                           | 12 weeks                         | Usual care | Community dwelling | Presence of low mobility (usual gate speed < 0.6 m/second) and poor nutrition (Mini Nutritional Assessment score < 24) | Frail            | 87 (84)      | 43 (41)             | 44 (43)        | 12 weeks                                            | Median or mean ± SD (kg)<br>Intervention<br>Pre 15.3 ± 4.6<br>Post 15.1 ± 4.8<br>Difference 0.5 (-2, 2)<br>Control<br>Pre 16.3 ± 5.0<br>Post 16.4 ± 5.3<br>Difference -1 (-2, 2)<br>No significant difference in mean change between pre- and post-intervention in the intervention compared with the control                                                                                                                                                                                                                                                                                                                                                  | ⊕⊕⊕⊕                                  | ⊕⊕⊕⊕                                   | ⊕⊕⊕⊕                                |
|                                                     | [45] Ng         | Nutritional supplement designed to augment caloric intake by about 20% and provide about one third of the recommended daily allowances of vitamins and minerals administered nurse                                                     | 6 months                         | Usual care | Community dwelling | Fried (CHS)                                                                                                            | Prefrail         | 99           | 49                  | 50             | 1 year                                              | Median or mean ± SD [kg]<br>Intervention<br>Pre 5.8 (1.81)<br>3 m 4.8 (1.21)<br>6 m 5.0 (1.02)<br>12 m 5.2 (1.21)<br>Control<br>Pre 5.6 (2.07)<br>3 m 5.1 (2.09)<br>6 m 4.9 (1.47)<br>12 m 5.1 (1.71)<br>No significant difference in change between intervention and control at any time                                                                                                                                                                                                                                                                                                                                                                      |                                       |                                        |                                     |
| Handgrip strength                                   | [40] Kim Suzuki | milk fat globule membrane (MFGM) supplementation                                                                                                                                                                                       | 3 months                         | Usual care | Community dwelling | Fried                                                                                                                  | Frail            | 65 (62)      | 32 (30)             | 33 (32)        | 12 weeks                                            | Median or mean ± SD [kg]<br>Intervention<br>Pre 15.3 ± 4.6<br>Post 15.1 ± 4.8<br>Difference 0.5 (-2, 2)<br>Control<br>Pre 16.3 ± 5.0<br>Post 16.4 ± 5.3<br>Difference -1 (-2, 2)<br>No significant difference in mean change between pre- and post-intervention in the intervention compared with the control                                                                                                                                                                                                                                                                                                                                                  | ⊕⊕⊕⊕                                  | ⊕⊕⊕⊕                                   | ⊕⊕⊕⊕                                |
|                                                     | [41] Kim Lee    | Nutritional supplementation (Protein-energy)                                                                                                                                                                                           | 12 weeks                         | Usual care | Community dwelling | Presence of low mobility (usual gate speed < 0.6 m/second) and poor nutrition (Mini Nutritional Assessment score < 24) | Frail            | 87 (84)      | 43 (41)             | 44 (42)        | 12 weeks                                            | Median or mean ± SD [kg]<br>Intervention<br>Pre 15.3 ± 4.6<br>Post 15.1 ± 4.8<br>Difference 0.5 (-2, 2)<br>Control<br>Pre 16.3 ± 5.0<br>Post 16.4 ± 5.3<br>Difference -1 (-2, 2)<br>No significant difference in mean change between pre- and post-intervention in the intervention compared with the control                                                                                                                                                                                                                                                                                                                                                  | ⊕⊕⊕⊕                                  | ⊕⊕⊕⊕                                   | ⊕⊕⊕⊕                                |

⊕⊕⊕⊕ **LOW** Due to study limitations, inconsistency (different populations and interventions), and imprecision

⊕⊕⊕⊕ **LOW** (only one quite small study)

⊕⊕⊕⊕ **LOW** only 2 quite small studies with some study limitations, imprecision

**Q1.3 Should exercise combined with nutritional interventions be recommended to prevent or delay the progression of or to revert frailty?**

Considering the evidence on the impact on Frailty as a whole (regardless of the definition used for the outcome)

| OUTCOME                                                                                             | Study           | Intervention                                                                                                                                                                                                                                                                                                                                          | Duration of intervention (total) | Comparison | Setting            | Frailty definition                                         | Frail - Prefrail | Pt n (total) | Pt n (intervention) | Pt n (control) | FUP duration                                         | Narrative description of results                                                                                                                                                                                                                                                                                                                                                                                                                 | Quality of evidence (GRADE) - overall                                                                                  | Quality of evidence (GRADE) - Prefrail | Quality of evidence (GRADE) - Frail                                                                                    |
|-----------------------------------------------------------------------------------------------------|-----------------|-------------------------------------------------------------------------------------------------------------------------------------------------------------------------------------------------------------------------------------------------------------------------------------------------------------------------------------------------------|----------------------------------|------------|--------------------|------------------------------------------------------------|------------------|--------------|---------------------|----------------|------------------------------------------------------|--------------------------------------------------------------------------------------------------------------------------------------------------------------------------------------------------------------------------------------------------------------------------------------------------------------------------------------------------------------------------------------------------------------------------------------------------|------------------------------------------------------------------------------------------------------------------------|----------------------------------------|------------------------------------------------------------------------------------------------------------------------|
| Frailty according to a composite index (continuous)                                                 | No study        |                                                                                                                                                                                                                                                                                                                                                       |                                  |            |                    |                                                            |                  |              |                     |                |                                                      |                                                                                                                                                                                                                                                                                                                                                                                                                                                  |                                                                                                                        |                                        |                                                                                                                        |
| Frailty according to a composite index (dichotomous - transition to a less severe frailty category) | [40] Kim Suzuki | Multicomponent exercise intervention moderate intensity (warm-up, strengthening exercises, balance and gait training, cool-down). Group, supervised (instructor + trainers), delivered at a research institute of gerontology PLUS Milk fat globule membrane (MFGM) supplementation.                                                                  | 3 months                         | Usual care | Community dwelling | Fried                                                      | Frail            | 66 (65)      | 33 (33)             | 33 (32)        | 3 months (+ 4 months of follow up post intervention) | Reversal post intervention: interv: 57.3% contr: 30.3% OR 3.12 (1.13-8.60) post 4 m: interv: 45.5% contr: 15.2% OR 4.67 (1.45-15.08)                                                                                                                                                                                                                                                                                                             |                                                                                                                        |                                        |                                                                                                                        |
| Short Physical Performance Battery                                                                  | No study        |                                                                                                                                                                                                                                                                                                                                                       |                                  |            |                    |                                                            |                  |              |                     |                |                                                      |                                                                                                                                                                                                                                                                                                                                                                                                                                                  |                                                                                                                        |                                        |                                                                                                                        |
| Time up and Go                                                                                      | [31] Bonnefoy   | Home based exercise (alone) PLUS dietary protein supplementation Multicomponent exercise intervention moderate intensity (warm-up, strengthening exercises, balance and gait training, cool-down). Group, supervised (instructor + trainers), delivered at a research institute of gerontology PLUS Milk fat globule membrane (MFGM) supplementation. | 4 months                         | Usual care | Community dwelling | score 3-6 on CCSHA-CFS TV and then by score ≥ 1 on CHS-PCF | Frail            | 102 (96)     |                     | 53             | 49 4 months                                          | Variation % (1st Q, 3rd Q) Intervention 5.45 (-17.2; 13.2) Control 0 (-11.5; 15.5) No significant difference in change pre-post between intervention and control<br>Intervention Pre 9.63 ± 2.15 Post 7.98 ± 1.44 Post 4 m 6.93 ± 1.61 Control Pre 10.44 ± 3.79 Post 10.00 ± 4.32 Post 4 m 7.99 ± 3.79 Significant difference in mean change between pre- and post-intervention in the intervention compared with the control - No effect at FUP | ⊕⊕⊕⊕                                                                                                                   |                                        | ⊕⊕⊕⊕                                                                                                                   |
| Walking Speed                                                                                       | [31] Bonnefoy   | Home based exercise (alone) PLUS dietary protein supplementation Multicomponent exercise intervention moderate intensity (warm-up, strengthening exercises, balance and gait training, cool-down). Group, supervised (instructor + trainers), delivered at a research institute of gerontology PLUS Milk fat globule membrane (MFGM) supplementation. | 4 months                         | Usual care | Community dwelling | score 3-6 on CCSHA-CFS TV and then by score ≥ 1 on CHS-PCF | Frail            | 102 (96)     |                     | 53             | 49 4 months                                          | Variation % (1st Q, 3rd Q) Intervention 0 (-13.7; 16.1) Control 0 (-19.5; 15.9) No significant difference in change pre-post between intervention and control<br>Intervention Pre 1.15 ± 0.16 Post 1.25 ± 0.24 Post 4 m 1.23 ± 0.21 Control Pre 1.18 ± 0.24 Post 1.13 ± 0.22 Post 4 m 1.18 ± 0.23 Significant difference in mean change between pre- and post-intervention in the intervention compared with the control - No effect at FUP      | LOW only 2 quite small studies with some study limitations, inconsistency (quite different interventions), imprecision | NA                                     | LOW only 2 quite small studies with some study limitations, inconsistency (quite different interventions), imprecision |
|                                                                                                     | [40] Kim Suzuki | Home based exercise (alone) PLUS dietary protein supplementation Multicomponent exercise intervention moderate intensity (warm-up, strengthening exercises, balance and gait training, cool-down). Group, supervised (instructor + trainers), delivered at a research institute of gerontology PLUS Milk fat globule membrane (MFGM) supplementation. | 3 months                         | Usual care | Community dwelling | Fried                                                      | Frail            | 66 (65)      | 33 (33)             | 33 (32)        | 3 months (+ 4 months of follow up post intervention) |                                                                                                                                                                                                                                                                                                                                                                                                                                                  |                                                                                                                        |                                        |                                                                                                                        |

|                   |                                                                                                                                                                                                                                                                                                            |          |            |                    |       |       |         |         |         |                                                      |                                                                                                                                                                                                                                                                                                                                                                                                                                                                           |
|-------------------|------------------------------------------------------------------------------------------------------------------------------------------------------------------------------------------------------------------------------------------------------------------------------------------------------------|----------|------------|--------------------|-------|-------|---------|---------|---------|------------------------------------------------------|---------------------------------------------------------------------------------------------------------------------------------------------------------------------------------------------------------------------------------------------------------------------------------------------------------------------------------------------------------------------------------------------------------------------------------------------------------------------------|
| Handgrip strength | <p><u>Multicomponent exercise intervention</u>, moderate intensity (warm-up, strengthening exercises, balance and gait training, cool-down). Group, supervised (instructor + trainers), delivered at a research institute of gerontology PLUS <u>Milk fat globule membrane (MFGM) supplementation</u>.</p> | 3 months | Usual care | Community dwelling | Fried | Frail | 66 (65) | 33 (33) | 33 (32) | 3 months (+ 4 months of follow up post intervention) | <p>Median or mean <math>\pm</math> SD [kg]</p> <p>Intervention<br/>Pre 17.19 <math>\pm</math> 3.79<br/>Post 17.83 <math>\pm</math> 4.05<br/>Post 4 m 17.00 <math>\pm</math> 3.88</p> <p>Control<br/>Pre 18.92 <math>\pm</math> 3.38<br/>Post 19.18 <math>\pm</math> 3.50<br/>Post 4 m 18.08 <math>\pm</math> 2.92</p> <p>No significant difference in mean change between pre- and post-intervention in the intervention compared with the control - No effect at FUP</p> |
|-------------------|------------------------------------------------------------------------------------------------------------------------------------------------------------------------------------------------------------------------------------------------------------------------------------------------------------|----------|------------|--------------------|-------|-------|---------|---------|---------|------------------------------------------------------|---------------------------------------------------------------------------------------------------------------------------------------------------------------------------------------------------------------------------------------------------------------------------------------------------------------------------------------------------------------------------------------------------------------------------------------------------------------------------|

| OUTCOME                                                                                             | Intervention category | Intervention sub-category                                                                                                  | Study                     | Intervention - description                                                                                                                                        | Duration of intervention (total) | Comparison | Setting                         | Frailty definition                                                                                                                                              | Frailty criteria                              | Frail - Prefrail                                                      | Pt n (total) | Pt n (intervention) | Pt n (control) | FUP duration             | Narrative description                                                                                                                                                                                                                                                                                                                                                                                                                                                                                                                                                                                                                              | Quality of evidence (GRADE) - overall | Quality of evidence (GRADE) - Prefrail | Quality of evidence (GRADE) - Frail |
|-----------------------------------------------------------------------------------------------------|-----------------------|----------------------------------------------------------------------------------------------------------------------------|---------------------------|-------------------------------------------------------------------------------------------------------------------------------------------------------------------|----------------------------------|------------|---------------------------------|-----------------------------------------------------------------------------------------------------------------------------------------------------------------|-----------------------------------------------|-----------------------------------------------------------------------|--------------|---------------------|----------------|--------------------------|----------------------------------------------------------------------------------------------------------------------------------------------------------------------------------------------------------------------------------------------------------------------------------------------------------------------------------------------------------------------------------------------------------------------------------------------------------------------------------------------------------------------------------------------------------------------------------------------------------------------------------------------------|---------------------------------------|----------------------------------------|-------------------------------------|
| Frailty according to a composite index (continuous)                                                 | 2. uni-professional   | Active Management (mainly) and (Psycho)educational - Only health care professionals - At home - Individual                 | [46] Van Hout             | Nurse home visits                                                                                                                                                 | at least 4 visits a year         | Usual Care | community dwelling              | composite of biomedical, functional and psychosocial indicators (based on COOP-WONCA charts)                                                                    | ≥ 2 of 6 COOP-WONCA charts                    | Frail                                                                 | 651          | 331                 | 320            | 18 months (and 6 months) | Effect size on COOP-WONCA-based Frailty not reported. They report SF-36 mean scores at baseline and FUP. They qualitative report a non statistically significant difference between intervention and control (non significant group*time interaction)                                                                                                                                                                                                                                                                                                                                                                                              | ⊕⊕⊕⊕                                  | ⊕⊕⊕⊕                                   | ⊕⊕⊕⊕                                |
|                                                                                                     | 2. uni-professional   | (Psycho)educational (mainly) and Active Management - Only health care professionals - At home (but not clear) - Individual | [47] Vriendt              | Client-centred, activity-oriented and community based intervention program, delivered by trained occupational therapists                                          | 8 to 10 weeks                    | Usual Care | community dwelling/primary care | based on b-ADL functioning (BEL-profile scale)                                                                                                                  | ≥ 1 impairment                                | Frail                                                                 | 168          | 86 (82)             | 82 (80)        | 8-10 weeks               | Mean difference (SD) between intervention and control in b-ADL scale change pre-post (b-ADL scores expressed as a percentage where 0% represented complete dependency and 100% complete independence) 6.7 (1.4 to 12.1), p = 0.013                                                                                                                                                                                                                                                                                                                                                                                                                 |                                       |                                        |                                     |
| Frailty according to a composite index (dichotomous - transition to a less severe frailty category) | 2. uni-professional   | (Psycho)educational - Not only health care professionals - At home - Individual                                            | [30] Behm [38] Gustafsson | single preventive home visit (1.5-2 h) made by an occupational therapist (OT), a physiotherapist (PT), a registered nurse (RN), or a qualified social worker (SW) | each home visit: 1.5-2 h         | Usual care | community dwelling              | 1. Measured as sum of 8 (Behm) or 6 (Gustafsson) biomedical, functional and psychosocial indicators; 2. Measured as tiredness in daily activities (Mob-T scale) | 1. ≥ 3 positive indicators                    | 13% non-frail<br>68% prefrail<br>19% frail                            | 288          | 174                 | 114            | 2 y                      | Deterioration in Frailty measured as <i>sum of indicators</i> , between Baseline and follow-up time<br><b>3 months % of No deterioration</b> in Frailty n (%)<br>Control 81 (71); Intervention 121 (70)<br>OR (95 CI) 0.93 (0.55-1.56)<br><b>1 year % of deterioration</b> control 39 %; intervention 34 %<br>OR (95 CI) 0.79 (0.49-1.28)<br><b>2 year % of deterioration</b> control 59 %; intervention 52 %<br>OR (95 CI) 0.77 (0.48-1.24)<br><u>BUT: Significant effect on deterioration in Frailty measured as <i>Tiredness</i> (with a lower rate of deterioration in intervention compared with control group) at 1 year (not at 2 year)</u> | ⊕⊕⊕⊕                                  | ⊕⊕⊕⊕                                   | ⊕⊕⊕⊕                                |
|                                                                                                     | 2. uni-professional   | (Psycho)educational (mainly) and Active Management - Only health care professionals - At home - Individual                 | [36] Favela               | Nurse home visits                                                                                                                                                 | weekly visits over 9 months      | Usual Care | community dwelling              | 1. 34-variable Frailty Index (Rookwood)<br>2. Fried                                                                                                             | 1. ≥ 0.14 in Frailty index<br>2. ≥ 3 criteria | All Frail according to Rookwood) - about 45% frail according to Fried | 88           | 44                  | 44             | 9 months                 | % Reversal from Frailty (Fried) [data in part derived from a graph]<br>Intervention about 11%<br>Control about 10%<br>% Development of Frailty<br>Intervention about 24.3%<br>Control about 12.8%<br>% Reversal from Frailty (Fried) [data in part derived from a graph]<br>Intervention 12.8%<br>Control about 10%<br>% Development of Frailty<br>Intervention about 5.1%<br>Control about 12.8%                                                                                                                                                                                                                                                  | ⊕⊕⊕⊕                                  | ⊕⊕⊕⊕                                   | ⊕⊕⊕⊕                                |
|                                                                                                     | 2. uni-professional   | (Psycho)educational (mainly) and Active Management - Only health care professionals - At home - Individual                 | [36] Favela               | Nurse home visits alone with alert buttons                                                                                                                        | weekly visits over 9 months      | Usual Care | community dwelling              | 1. 34-variable Frailty Index (Rookwood)<br>2. Fried                                                                                                             | 1. ≥ 0.14 in Frailty index<br>2. ≥ 3 criteria | All Frail according to Rookwood) - about 45% frail according to Fried | 89           | 45                  | 44             | 9 months                 |                                                                                                                                                                                                                                                                                                                                                                                                                                                                                                                                                                                                                                                    | ⊕⊕⊕⊕                                  | ⊕⊕⊕⊕                                   | ⊕⊕⊕⊕                                |

⊕⊕⊕⊕ **LOW**  
Due to study limitations, inconsistency (different populations and interventions), imprecision

⊕⊕⊕⊕ **LOW**  
(only one study)

⊕⊕⊕⊕ **LOW**  
Due to substantial study limitations, inconsistency (different interventions), imprecision



Q2.2 Should MULTI-PROFESSIONAL interventions based on tailored care/GEM be recommended to prevent or delay the progression of or to revert frailty?

| OUTCOME                                                                                             | Intervention category                                                    | Intervention sub-category                                                                                            | Study                                                                                       | Intervention - description                                                                                                                                                                                                                                                | Duration of intervention (total)                                                                                                                                                                                                 | Comparison                             | Setting                         | Frailty definition                                                                                                                                              | Frailty criteria                                    | Frail - Prefrail                                                                            | Pt n (total)         | Pt n (intervention)                                      | Pt n (control) | FUP duration | Narrative description                                                                                                                                                                                                                                                                                                                                                                                                                                                                                                                                                                                 | Considering the evidence on the impact on Frailty as a whole (regardless of the definition used for the outcome)                                                                                                         |                                        |                                     |
|-----------------------------------------------------------------------------------------------------|--------------------------------------------------------------------------|----------------------------------------------------------------------------------------------------------------------|---------------------------------------------------------------------------------------------|---------------------------------------------------------------------------------------------------------------------------------------------------------------------------------------------------------------------------------------------------------------------------|----------------------------------------------------------------------------------------------------------------------------------------------------------------------------------------------------------------------------------|----------------------------------------|---------------------------------|-----------------------------------------------------------------------------------------------------------------------------------------------------------------|-----------------------------------------------------|---------------------------------------------------------------------------------------------|----------------------|----------------------------------------------------------|----------------|--------------|-------------------------------------------------------------------------------------------------------------------------------------------------------------------------------------------------------------------------------------------------------------------------------------------------------------------------------------------------------------------------------------------------------------------------------------------------------------------------------------------------------------------------------------------------------------------------------------------------------|--------------------------------------------------------------------------------------------------------------------------------------------------------------------------------------------------------------------------|----------------------------------------|-------------------------------------|
|                                                                                                     |                                                                          |                                                                                                                      |                                                                                             |                                                                                                                                                                                                                                                                           |                                                                                                                                                                                                                                  |                                        |                                 |                                                                                                                                                                 |                                                     |                                                                                             |                      |                                                          |                |              |                                                                                                                                                                                                                                                                                                                                                                                                                                                                                                                                                                                                       | Quality of evidence (GRADE) - overall                                                                                                                                                                                    | Quality of evidence (GRADE) - Prefrail | Quality of evidence (GRADE) - Frail |
| Frailty according to a composite index (dichotomous - transition to a less severe frailty category) | 1. multi-professional                                                    | (Psycho)educational - Not only health care professionals - At home - Group based and Individual                      | [30] Behm [38] Gustafsson                                                                   | multi-professional senior group meetings with one follow-up home visit occupational therapist (OT), a physiotherapist (PT), a registered nurse (RN), or a qualified social worker (SW)                                                                                    | 6-7 w                                                                                                                                                                                                                            | Usual care                             | community dwelling              | 1. Measured as sum of 8 (Behm) or 6 (Gustafsson) biomedical, functional and psychosocial indicators; 2. Measured as tiredness in daily activities (Mob-T scale) | 1. ≥ 3 positive indicators                          | 13% non-frail<br>68% prefrail<br>19% frail                                                  | 285                  | 171                                                      | 114            | 2 y          | Deterioration in Frailty measured as sum of indicators, between Baseline and follow-up time<br>3 months % of No deterioration in Frailty n (%)<br>Control 81 (71); Intervention 110 (64)<br>OR (95% CI) 0.73 (0.44-1.23)<br>1 year % of deterioration control 39%; intervention 34%<br>OR (95% CI) 0.79 (0.48-1.29)<br>2 year % of deterioration control 59%; intervention 47%<br>OR (95% CI) 0.63 (0.39-1.02)<br>BUT: Significant effect on deterioration in Frailty measured as Tiredness, with a lower rate of deterioration in intervention compared with control group at 1 year (not at 2 year) |                                                                                                                                                                                                                          |                                        |                                     |
|                                                                                                     | 1. multi-professional                                                    | Active management - Not only health care professionals - At home + community hospital - Individual                   | [42] Li                                                                                     | Screening evaluation based on CGA by trained nurses + appropriate intervention based on screening results (CGA report revised by two geriatricians; intervention programs delivered by medical professionals, but involving other professionals including social workers) | not specified                                                                                                                                                                                                                    | Screening evaluation based on CGA only | community hospital              | Fried                                                                                                                                                           | ≥ 3 criteria                                        | pre-frail or frail (mostly pre-frail)                                                       | 310                  | 152 (129)                                                | 158 (140)      | 6 months     | % Deterioration in Frailty status intervention 8.5%<br>Control 10.7%<br>OR (95% CI) 0.78 (0.34-1.79)<br>% Improvement in Frailty status Intervention 4.6%<br>Control 1.4%<br>OR (95% CI) 0.94 (0.42-2.12)                                                                                                                                                                                                                                                                                                                                                                                             |                                                                                                                                                                                                                          |                                        |                                     |
|                                                                                                     | 1. multi-professional                                                    | Active management - Not only health care professionals - from the ED, across different settings of care - Individual | [23] Eklund                                                                                 | Individual, provided by professionals in nursing with geriatric competence (emergency department), occupational therapy, physiotherapy and social work (municipality), no geriatrician                                                                                    | 1 y                                                                                                                                                                                                                              | Usual care                             | patients discharged from the ED | composite of biomedical, functional and psychosocial indicators                                                                                                 | ≥ 2 positive indicators among the ones prespecified | Mostly frail and pre-frail (non frail only 5% in the control 0.5 24 26 76 69, respectively) | 161 (181 randomized) | 85                                                       | 76             | 1 y          | Improvement in Frailty measure % (n)<br>3 month intervention 8 (7)<br>control 13 (10)<br>OR (95% CI) 0.59 (0.21-1.64)<br>6 month intervention 12 (10)<br>control 17 (13)<br>OR (95% CI) 0.65 (0.27-1.57)<br>12 month intervention 12 (10)<br>control 22 (17)<br>OR (95% CI) 0.46 (0.20-1.09)                                                                                                                                                                                                                                                                                                          | ⊕⊕⊕⊕                                                                                                                                                                                                                     | ⊕⊕⊕⊕                                   | LOW                                 |
|                                                                                                     | 1. multi-professional                                                    | Active management - Only health care professionals - At home - Individual                                            | [26] Fairhall                                                                               | Individual, provided by two physiotherapists, a geriatrician, rehabilitation physician, dietician, and nurse, GEM based                                                                                                                                                   | 1 y                                                                                                                                                                                                                              | Usual care                             | community dwelling              | Fried                                                                                                                                                           | ≥ 3 criteria                                        | frail                                                                                       | 241                  | 120                                                      | 121            | 1 y          | Intervention 71 (64); Control 88 (75)<br>Difference Between Groups, Adjusted for Month 0. Intervention Minus Control (95% CI, P Value)<br>-11.3% (-23.3% to -0.7%, P 0.07)<br>12 month n Frail (%)<br>Intervention 66 (62); Control 84 (77)<br>Difference Between Groups, Adjusted for Month 0. Intervention Minus Control (95% CI, P Value)<br>-14.7% (-27.0% to -2.4%, P 0.02)<br>% Reversal from at risk of frailty to not at risk of frailty<br>Control 13.5%; Intervention 27.9%<br>Adjusted OR (95% CI) for reversal 3.08 (1.21-7.82)                                                           | ⊕⊕⊕⊕                                                                                                                                                                                                                     | ⊕⊕⊕⊕                                   | LOW                                 |
|                                                                                                     | 1. multi-professional                                                    | Active management - Only health care professionals - At the primary care centre - Individual                         | [43] Montesperin                                                                            | Individual CGA + group based recommendations by a trained nurse about healthy habits and adherence to treatment (if not at risk of frailty) + Individual based sessions with geriatrician (if at risk of frailty)                                                         | group session with the nurse: 45 mins; individual sessions with the geriatrician 30 mins                                                                                                                                         | Usual care                             | community dwelling/primary care | composite of biomedical, functional and psychosocial indicators                                                                                                 | ≥ 2 positive indicators among the ones prespecified | at risk of frailty                                                                          | 620                  | 308 (157 not at risk of frailty; 151 at risk of frailty) | 312            | 18 months    | % Progression from not at risk of frailty to at risk of frailty<br>Control 33.8% Intervention 20.4% (p=0.0027)                                                                                                                                                                                                                                                                                                                                                                                                                                                                                        | ⊕⊕⊕⊕                                                                                                                                                                                                                     | ⊕⊕⊕⊕                                   | LOW                                 |
|                                                                                                     | Other composite measures of Frailty as Physical Performance (continuous) | 1. multi-professional                                                                                                | Active management - Not only health care professionals - at hospital discharge - Individual | [35] Cohen                                                                                                                                                                                                                                                                | Outpatient care in a GEM unit, individual-based, provided by a geriatrician, a social worker, and a nurse - using Preventive and management services (e.g., dietetics, physical and occupational therapy, and clinical pharmacy) | 1 y                                    | Usual care                      | inpatients (once discharged)                                                                                                                                    | composite of functional and psychosocial indicators | ≥ 2 positive indicators among the ones prespecified                                         | frail                | 1388                                                     | 692            | 696          | 1 y                                                                                                                                                                                                                                                                                                                                                                                                                                                                                                                                                                                                   | mean changes in the Physical Performance Test scores (adjusted for the length of stay)<br>At discharge intervention 2.34<br>Control 2.60<br>P 0.24<br>12 month Intervention 4.67 (2.13)<br>Control 4.07 (1.30)<br>P 0.12 |                                        |                                     |
| 1. multi-professional                                                                               |                                                                          | Active management - Not only health care professionals - In hospital - Individual                                    | [35] Cohen                                                                                  | Inpatient care in a GEM unit, individual-based, provided by a geriatrician, a social worker, and a nurse - using Preventive and management services (e.g., dietetics, physical and occupational therapy, and clinical pharmacy)                                           | 30 days                                                                                                                                                                                                                          | Usual care                             | inpatients                      | composite of functional and psychosocial indicators                                                                                                             | ≥ 2 positive indicators among the ones prespecified | frail                                                                                       | 1388                 | 694                                                      | 694            | 1 y          | mean changes in the Physical Performance Test scores (adjusted for the length of stay)<br>At discharge intervention 3.12<br>Control 1.75<br>P <0.001<br>At 12 month intervention 4.50<br>Control 4.24<br>P 0.51                                                                                                                                                                                                                                                                                                                                                                                       |                                                                                                                                                                                                                          |                                        |                                     |

Q3 Should other types of interventions be recommended to prevent or delay the progression of or to revert frailty?

| Intervention group | Intervention subgroup                     | Study       | Intervention description                                                                                                                                                                                                                                                                                                                                                                                                                                                                                                                         | Duration of intervention (total) | Comparison                                                                            | Setting            | Frailty definition                                                                                                                       | Frail - Prefrail                          | Pt n    |           | FUP duration | OC Frailty - continuous | OC Frailty - dichotomous                                                                                                                                                                                                                                                                                                                                                       | OC TUG                                                                                                                                                                                                                                                                         | OC Walking speed                                                                                                                                       | OC grip strenght | OC SPBB | Comment | Quality of evidence |                                                                                                                                                                      |                                                                                                                                                                      |                                                                                                                                                                      |
|--------------------|-------------------------------------------|-------------|--------------------------------------------------------------------------------------------------------------------------------------------------------------------------------------------------------------------------------------------------------------------------------------------------------------------------------------------------------------------------------------------------------------------------------------------------------------------------------------------------------------------------------------------------|----------------------------------|---------------------------------------------------------------------------------------|--------------------|------------------------------------------------------------------------------------------------------------------------------------------|-------------------------------------------|---------|-----------|--------------|-------------------------|--------------------------------------------------------------------------------------------------------------------------------------------------------------------------------------------------------------------------------------------------------------------------------------------------------------------------------------------------------------------------------|--------------------------------------------------------------------------------------------------------------------------------------------------------------------------------------------------------------------------------------------------------------------------------|--------------------------------------------------------------------------------------------------------------------------------------------------------|------------------|---------|---------|---------------------|----------------------------------------------------------------------------------------------------------------------------------------------------------------------|----------------------------------------------------------------------------------------------------------------------------------------------------------------------|----------------------------------------------------------------------------------------------------------------------------------------------------------------------|
|                    |                                           |             |                                                                                                                                                                                                                                                                                                                                                                                                                                                                                                                                                  |                                  |                                                                                       |                    |                                                                                                                                          |                                           | (total) | (control) |              |                         |                                                                                                                                                                                                                                                                                                                                                                                |                                                                                                                                                                                                                                                                                |                                                                                                                                                        |                  |         |         |                     |                                                                                                                                                                      |                                                                                                                                                                      |                                                                                                                                                                      |
| Other              | Cognitive training                        | [45] Ng     | Activities designed to stimulate short-term memory, and enhance attention and information-processing skills, and reasoning and problem solving abilities in the first 12 weeks. In the subsequent 12 weeks "booster" sessions, focusing on the revision of the cognitive skills learned.                                                                                                                                                                                                                                                         | 6 months                         | Usual care                                                                            | Community dwelling | Fried                                                                                                                                    | Prefrail                                  | 98      | 48        | 50           | 1 year                  | M (SD)<br>Intervention<br>Pre 2.0 (0.91)<br>3 m 1.3 (0.81)<br>6 m 1.4 (0.78)<br>12 m 1.4 (0.94)<br>Control<br>Pre 1.8 (0.80)<br>3 m 1.3 (0.85)<br>6 m 1.4 (1.06)<br>12 m 1.6 (0.97)<br>Significant difference in change between intervention and control at 12 m.<br>Transition to a lower frailty category<br>interv: 35.6%<br>contr: 15.2%<br>OR 2.89 (1.07-7.82)            | M (SD) [sec]<br>Intervention<br>Pre 5.4 (1.16)<br>3 m 4.7 (0.97)<br>6 m 4.6 (0.80)<br>12 m 5.2 (1.05)<br>Control<br>Pre 5.6 (2.07)<br>3 m 5.1 (2.09)<br>6 m 4.9 (1.47)<br>12 m 5.2 (1.72)<br>No significant difference in change between intervention and control at any time. |                                                                                                                                                        |                  |         |         |                     |                                                                                                                                                                      |                                                                                                                                                                      | see Table 3 of FOCUS D4.1.2<br>Systematic Review: A systematic review of the effectiveness of frailty interventions for methodological appraisal of studies included |
| Physical           | Exercise + nutrition + cognitive training | [45] Ng     | Multicomponent exercise intervention, moderate, gradually increasing intensity, tailored to participants' individual abilities. Resistance exercises, balance training exercises involving functional strength, sensory input, and added attentional demands. Group, supervised by a qualified trainer (for 12 weeks) then alone PLUS nutritional supplement designed to augment caloric intake by about 20% and provide about one third of the recommended daily allowances of vitamins and minerals administered nurse PLUS cognitive training | 6 months                         | Usual care                                                                            | Community dwelling | Fried                                                                                                                                    | Prefrail                                  | 98      | 48        | 50           | 1 year                  | M (SD)<br>Intervention<br>Pre 2.1 (0.81)<br>3 m 1.3 (0.84)<br>6 m 1.4 (0.87)<br>12 m 1.2 (1.07)<br>Control<br>Pre 1.8 (0.80)<br>3 m 1.3 (0.85)<br>6 m 1.4 (1.06)<br>12 m 1.6 (0.97)<br>Significant difference in change between intervention and control at 3m, 6m and 12 m.<br>Transition to a lower frailty category<br>interv: 47.8%<br>contr: 15.2%<br>OR 5.00 (1.88-13.3) | M (SD) [sec]<br>Intervention<br>Pre 5.4 (1.25)<br>3 m 4.7 (1.20)<br>6 m 4.8 (1.13)<br>12 m 5.3 (2.17)<br>Control<br>Pre 5.6 (2.07)<br>3 m 5.1 (2.09)<br>6 m 4.9 (1.47)<br>12 m 5.2 (1.72)<br>No significant difference in change between intervention and control at any time. | Mean change from baseline in placebo group (CI 95%) [kg]:<br>1.2 (2.4; 0.0)<br>Difference between placebo and study agent (95 % CI)<br>0.2 (-1.8; 2.1) |                  |         |         |                     |                                                                                                                                                                      | see Table 3 of FOCUS D4.1.2<br>Systematic Review: A systematic review of the effectiveness of frailty interventions for methodological appraisal of studies included |                                                                                                                                                                      |
| Other              | Hormone therapy                           | [44] Muller | atamestane                                                                                                                                                                                                                                                                                                                                                                                                                                                                                                                                       | 36 w                             | Placebo                                                                               | Community dwelling | Physical indicators (isometric grip strength <30 kg and leg extensor power <100 Nm)                                                      | Prefrail (not explicitly defined as such) | 49      | 25        | 24           | 36 w                    |                                                                                                                                                                                                                                                                                                                                                                                |                                                                                                                                                                                                                                                                                |                                                                                                                                                        |                  |         |         | only men, aged ≥ 70 | see Table 3 of FOCUS D4.1.2<br>Systematic Review: A systematic review of the effectiveness of frailty interventions for methodological appraisal of studies included |                                                                                                                                                                      |                                                                                                                                                                      |
| Other              | Hormone therapy                           | [44] Muller | DHEA                                                                                                                                                                                                                                                                                                                                                                                                                                                                                                                                             | 36 w                             | Placebo                                                                               | Community dwelling | Physical indicators (isometric grip strength <30 kg and leg extensor power <100 Nm)                                                      | Prefrail (not explicitly defined as such) | 49      | 25        | 24           | 36 w                    |                                                                                                                                                                                                                                                                                                                                                                                |                                                                                                                                                                                                                                                                                |                                                                                                                                                        |                  |         |         | only men, aged ≥ 70 | see Table 3 of FOCUS D4.1.2<br>Systematic Review: A systematic review of the effectiveness of frailty interventions for methodological appraisal of studies included |                                                                                                                                                                      |                                                                                                                                                                      |
| Other              | Hormone therapy                           | [44] Muller | atamestane + DHEA                                                                                                                                                                                                                                                                                                                                                                                                                                                                                                                                | 36 w                             | Placebo                                                                               | Community dwelling | Physical indicators (isometric grip strength <30 kg and leg extensor power <100 Nm)                                                      | Prefrail (not explicitly defined as such) | 50      | 26        | 24           | 36 w                    |                                                                                                                                                                                                                                                                                                                                                                                |                                                                                                                                                                                                                                                                                |                                                                                                                                                        |                  |         |         | only men, aged ≥ 70 | see Table 3 of FOCUS D4.1.2<br>Systematic Review: A systematic review of the effectiveness of frailty interventions for methodological appraisal of studies included |                                                                                                                                                                      |                                                                                                                                                                      |
| Other              | Exercise + nutritional consultation       | [33] Chan   | Multicomponent exercise intervention (stretching, resistance training, postural control and balance training). Group (7), supervised (7), performed at the participating hospital. During exercise sessions participants received nutritional consultations and were then followed-up over teh phone to assess compliance with dietary advice                                                                                                                                                                                                    | 3 times a week for 3 months      | No intervention (educational booklet provided to both intervention and control group) | Community dwelling | Chinese Canadian Study of Health and Aging Clinical Frailty Scale (CCSHA_CFS_IV) combined with modified Fried criteria                   | 87% prefrail<br>13% frail                 | 117     | 55        | 62           | 12 mo                   |                                                                                                                                                                                                                                                                                                                                                                                |                                                                                                                                                                                                                                                                                |                                                                                                                                                        |                  |         |         |                     | see Table 3 of FOCUS D4.1.2<br>Systematic Review: A systematic review of the effectiveness of frailty interventions for methodological appraisal of studies included |                                                                                                                                                                      |                                                                                                                                                                      |
| Other              | Problem Solving Therapy                   | [33] Chan   | Sessions of psychotherapy to solve the "here-and-now" problems contributing to their mood-related conditions and helps increase their self-efficacy, led by case managers                                                                                                                                                                                                                                                                                                                                                                        | 6 sessions for 3 months          | No intervention (educational booklet provided to both intervention and control group) | Community dwelling | Chinese Canadian Study of Health and Aging Clinical Frailty Scale Telephone Version (CCSHA_CFS_IV) combined with modified Fried criteria | 87% prefrail<br>13% frail                 | 117     | 57        | 60           | 12 mo                   |                                                                                                                                                                                                                                                                                                                                                                                |                                                                                                                                                                                                                                                                                |                                                                                                                                                        |                  |         |         |                     | see Table 3 of FOCUS D4.1.2<br>Systematic Review: A systematic review of the effectiveness of frailty interventions for methodological appraisal of studies included |                                                                                                                                                                      |                                                                                                                                                                      |
