# Supplementary material for: Interventions to prevent, delay or reverse frailty in older people: a journey towards clinical guidelines
Source: Springer Nature journal article supplement (doi:10.1186/s12916-019-1434-2), 2019-10-29
Supplement: MOESM3 [file 17327164]

**Table S1. The FOCUS guidelines panel**

| Panelist                      |                                                                                   |                                                                        | Role in the guidelines development        |                                                    |        |                                    |
|-------------------------------|-----------------------------------------------------------------------------------|------------------------------------------------------------------------|-------------------------------------------|----------------------------------------------------|--------|------------------------------------|
| Name<br>(alphabetic<br>order) | Institution and<br>Country                                                        | Profile                                                                | Technical team<br>- iEtD<br>administrator | Evidence<br>base<br>generation<br>and/or<br>review | Voting | Revision of<br>final<br>guidelines |
| João Apóstolo                 | Escola Superior de Enfermagem de Coimbra (ESENFC), Portugal                       | Psychogeriatric nurse, Professor of Ageing                             |                                           | x                                                  | x      | x                                  |
| Elzbieta Bobrowicz-Campos     | Escola Superior de Enfermagem de Coimbra (ESENFC), Portugal                       | Specialist in clinical and health psychology                           |                                           | x                                                  | x      | x                                  |
| Maria Bujnowska-Fedak         | Wroclaw Medical University (WMU), Poland                                          | Family medicine specialist and geriatrician                            |                                           | x                                                  | x      | x                                  |
| Antonio Cano                  | Universitat de València (UVEG)                                                    | Professor of Obstetrics and Gynaecology, specialist in ageing of women |                                           | x                                                  | x      | x                                  |
| Richard Cooke                 | Aston Research Centre for Healthy Ageing, Aston University (ARCHA), UK            | Health psychologist, Senior Lecturer                                   |                                           | x                                                  |        | x                                  |
| Barbara D'Avanzo              | IRCCS Istituto di Ricerche Farmacologiche "Mario Negri", Italy                    | Senior researcher in mental health and ageing                          |                                           | x                                                  | x      | x                                  |
| Sarah Damanti                 | Fondazione IRCCS Cà Granda - Ospedale Maggiore Policlinico, Italy                 | Geriatrician, PhD candidate                                            | x                                         | x                                                  |        | x                                  |
| Federico Germini              | Fondazione IRCCS Cà Granda - Ospedale Maggiore Policlinico, Italy                 | Emergency medicine physician and clinical epidemiologist               | x                                         | x                                                  |        | x                                  |
| Holly Gwyther                 | Aston Research Centre for Healthy Ageing, Aston University (ARCHA), England       | Chartered psychologist specialising in ageing                          |                                           | x                                                  | x      | x                                  |
| Carol Holland                 | Centre for Ageing Research, Division of Health Research, Lancaster University, UK | Chartered psychologist, Professor of Ageing                            |                                           | x                                                  | x      | x                                  |
| Donata Kurpas                 | Wroclaw Medical University (WMU), Poland                                          | Family medicine specialist and public health specialist                |                                           | x                                                  | x      | x                                  |

|                   |                                                                        |                                                                                    |   |   |   |   |
|-------------------|------------------------------------------------------------------------|------------------------------------------------------------------------------------|---|---|---|---|
| Maura Marcucci    | Fondazione IRCCS Cà Granda - Ospedale Maggiore Policlinico             | General internist and clinical epidemiologist                                      | x | x |   | x |
| Alessandro Nobili | IRCCS Istituto di Ricerche Farmacologiche "Mario Negri", Italy         | Clinical pharmacologist of ageing                                                  |   | x | x | x |
| Silvina Santana   | University of Aveiro (UAVR), Portugal                                  | Health services management and research, Professor of Business Management Sciences |   | x | x | x |
| Rachel Shaw       | Aston Research Centre for Healthy Ageing, Aston University (ARCHA), UK | Health Psychologist, Reader in Psychology                                          |   | x |   | x |
| Katarzyna Szwamel | Wroclaw Medical University (WMU), Poland                               | Emergency nurse academic teacher, PhD candidate                                    |   |   | x | x |
